# Supplementary material for: Temperatures Outside the Optimal Range for Helicobacter pylori Increase Its Harboring within Candida Yeast Cells
Source: MDPI journal article supplement (doi:10.3390/biology10090915), 2021-09-14
Supplement: s1 [file s1]

Supplementary figures and table:

**Table S1:** Analysis to evaluate if there were significant differences in Y-BLBs means when strains of *H. pylori* were incubated with *Candida* strains in 48 h co-cultures incubated at 40 °C.

| <i>H. pylori</i> strains | <i>Candida</i> strains |            |         |         | Mean    | Tukey's test |   |
|--------------------------|------------------------|------------|---------|---------|---------|--------------|---|
|                          | ATCC 90028             | ATCC 90030 | LEO-37  | VT-3    |         |              |   |
| G-27                     | 9.6667                 | 9.6667     | 18.3333 | 11.6667 | 12.3333 | ATCC 90028   | A |
| H707                     | 15.3333                | 14.6667    | 20.3333 | 15.6667 | 16.5000 | ATCC 90030   | A |
| J99                      | 25.3333                | 23.0000    | 24.6667 | 24.6667 | 24.4167 | LEO-37       | A |
| SS-1                     | 12.3333                | 15.6667    | 15.3333 | 13.6667 | 14.2500 | VT-3         | A |
| Mean                     | 15.6667                | 15.7500    | 19.6667 | 16.4167 |         |              |   |

ANOVA: Single Factor

Means sharing the same letter were not significantly different ( $p > 0.05$ ) according to the Tukey test.

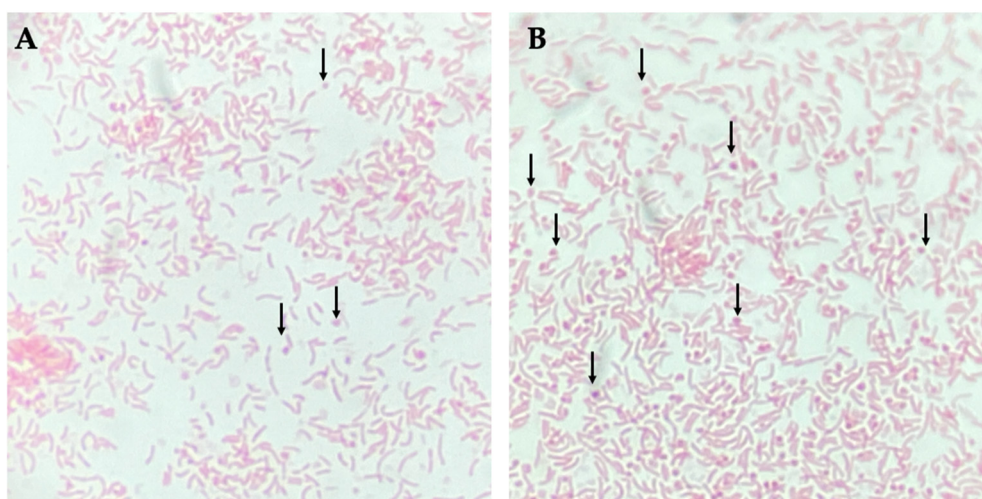

**Figure S1:** Gram staining of *H. pylori* J99 cultures incubated at A) 37 °C or B) 40 °C showing the increased number of coccoid cells when incubated at 40 °C.

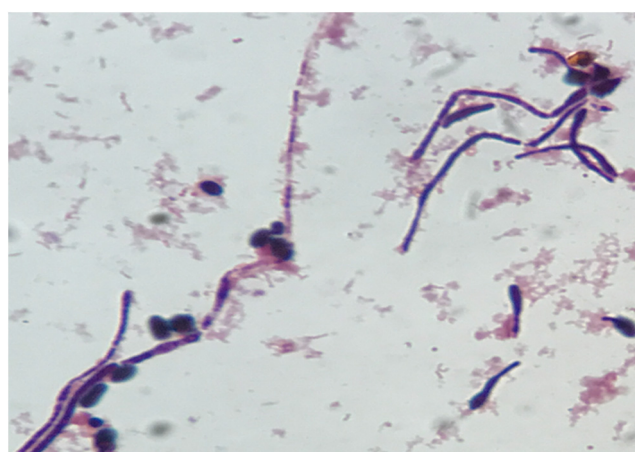

**Figure S2:** Gram-staining of *H. pylori* H707-*C. albicans* VT-3 co-culture showing the co-aggregation of both microorganisms. Observe the preference of *H. pylori* cells for filamentous structures (pseudohyphae and hyphae).
